# Supplementary material
Source: PubMed Central journal article supplement (PMC5827611)
Supplement: ASN.2017091036SupplementaryData1.pdf [file ASN.2017091036SupplementaryData1.pdf]

# Supplementary figure 1

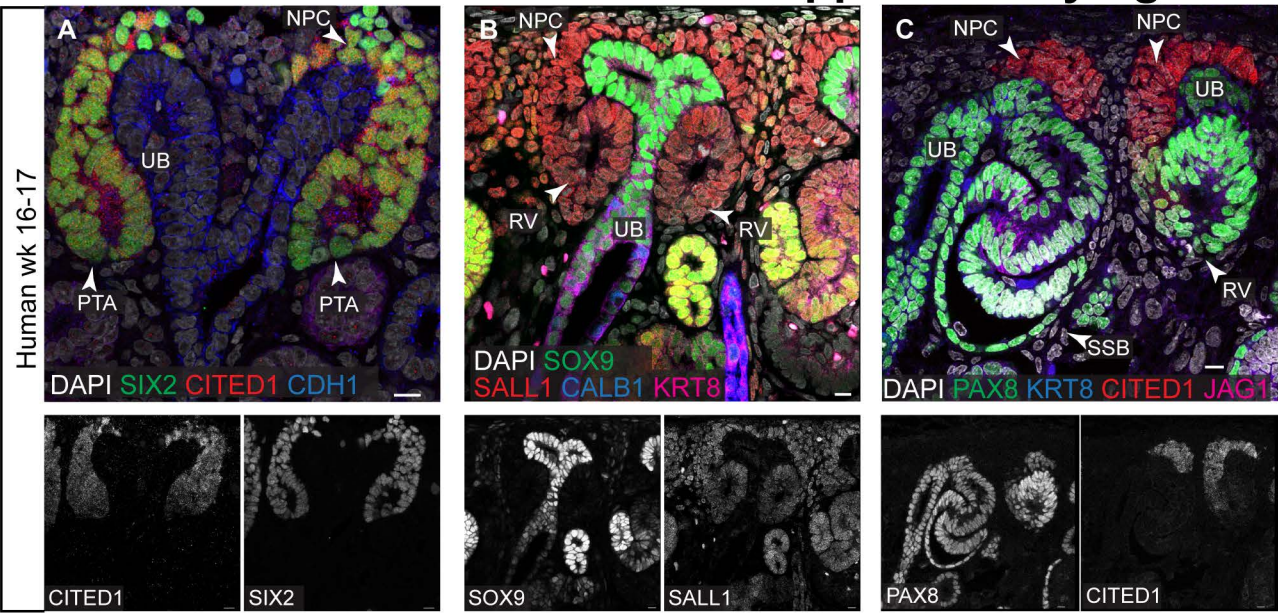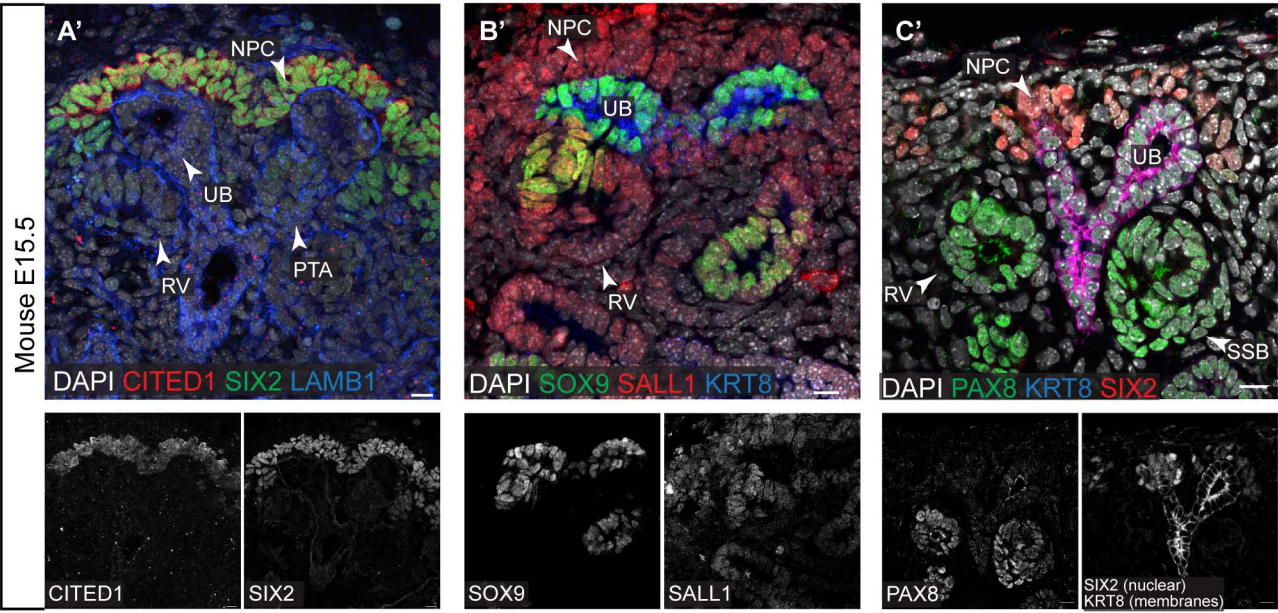

# Supplementary figure 2

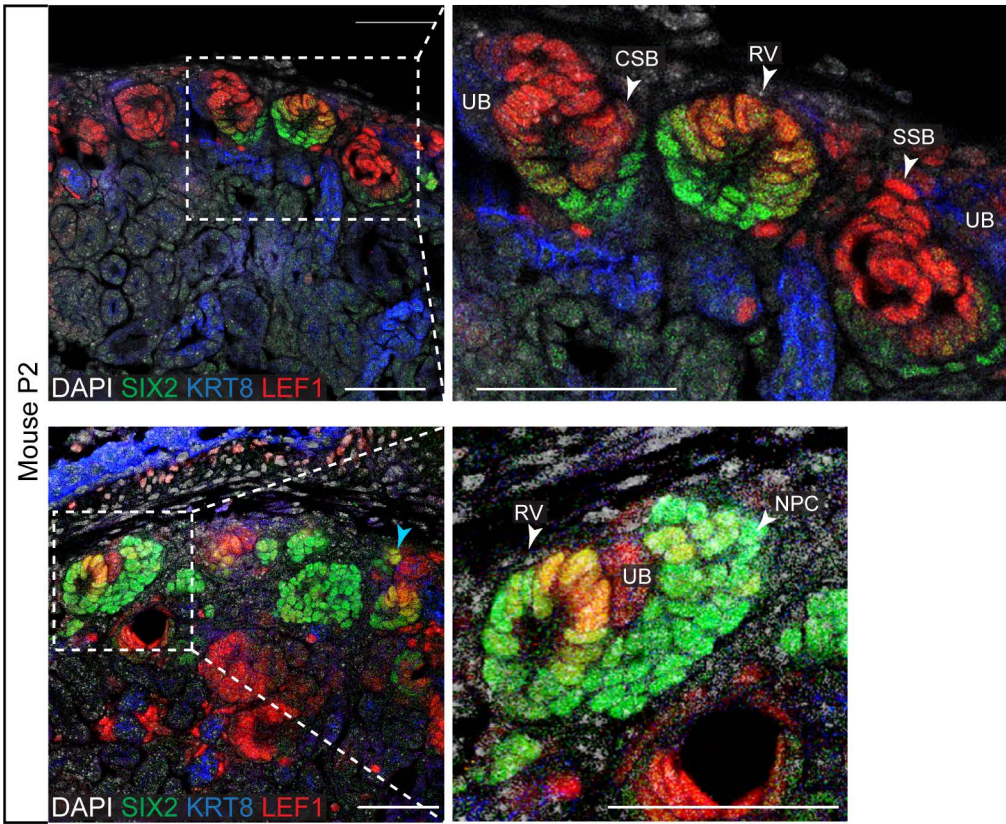

# Supplementary figure 3

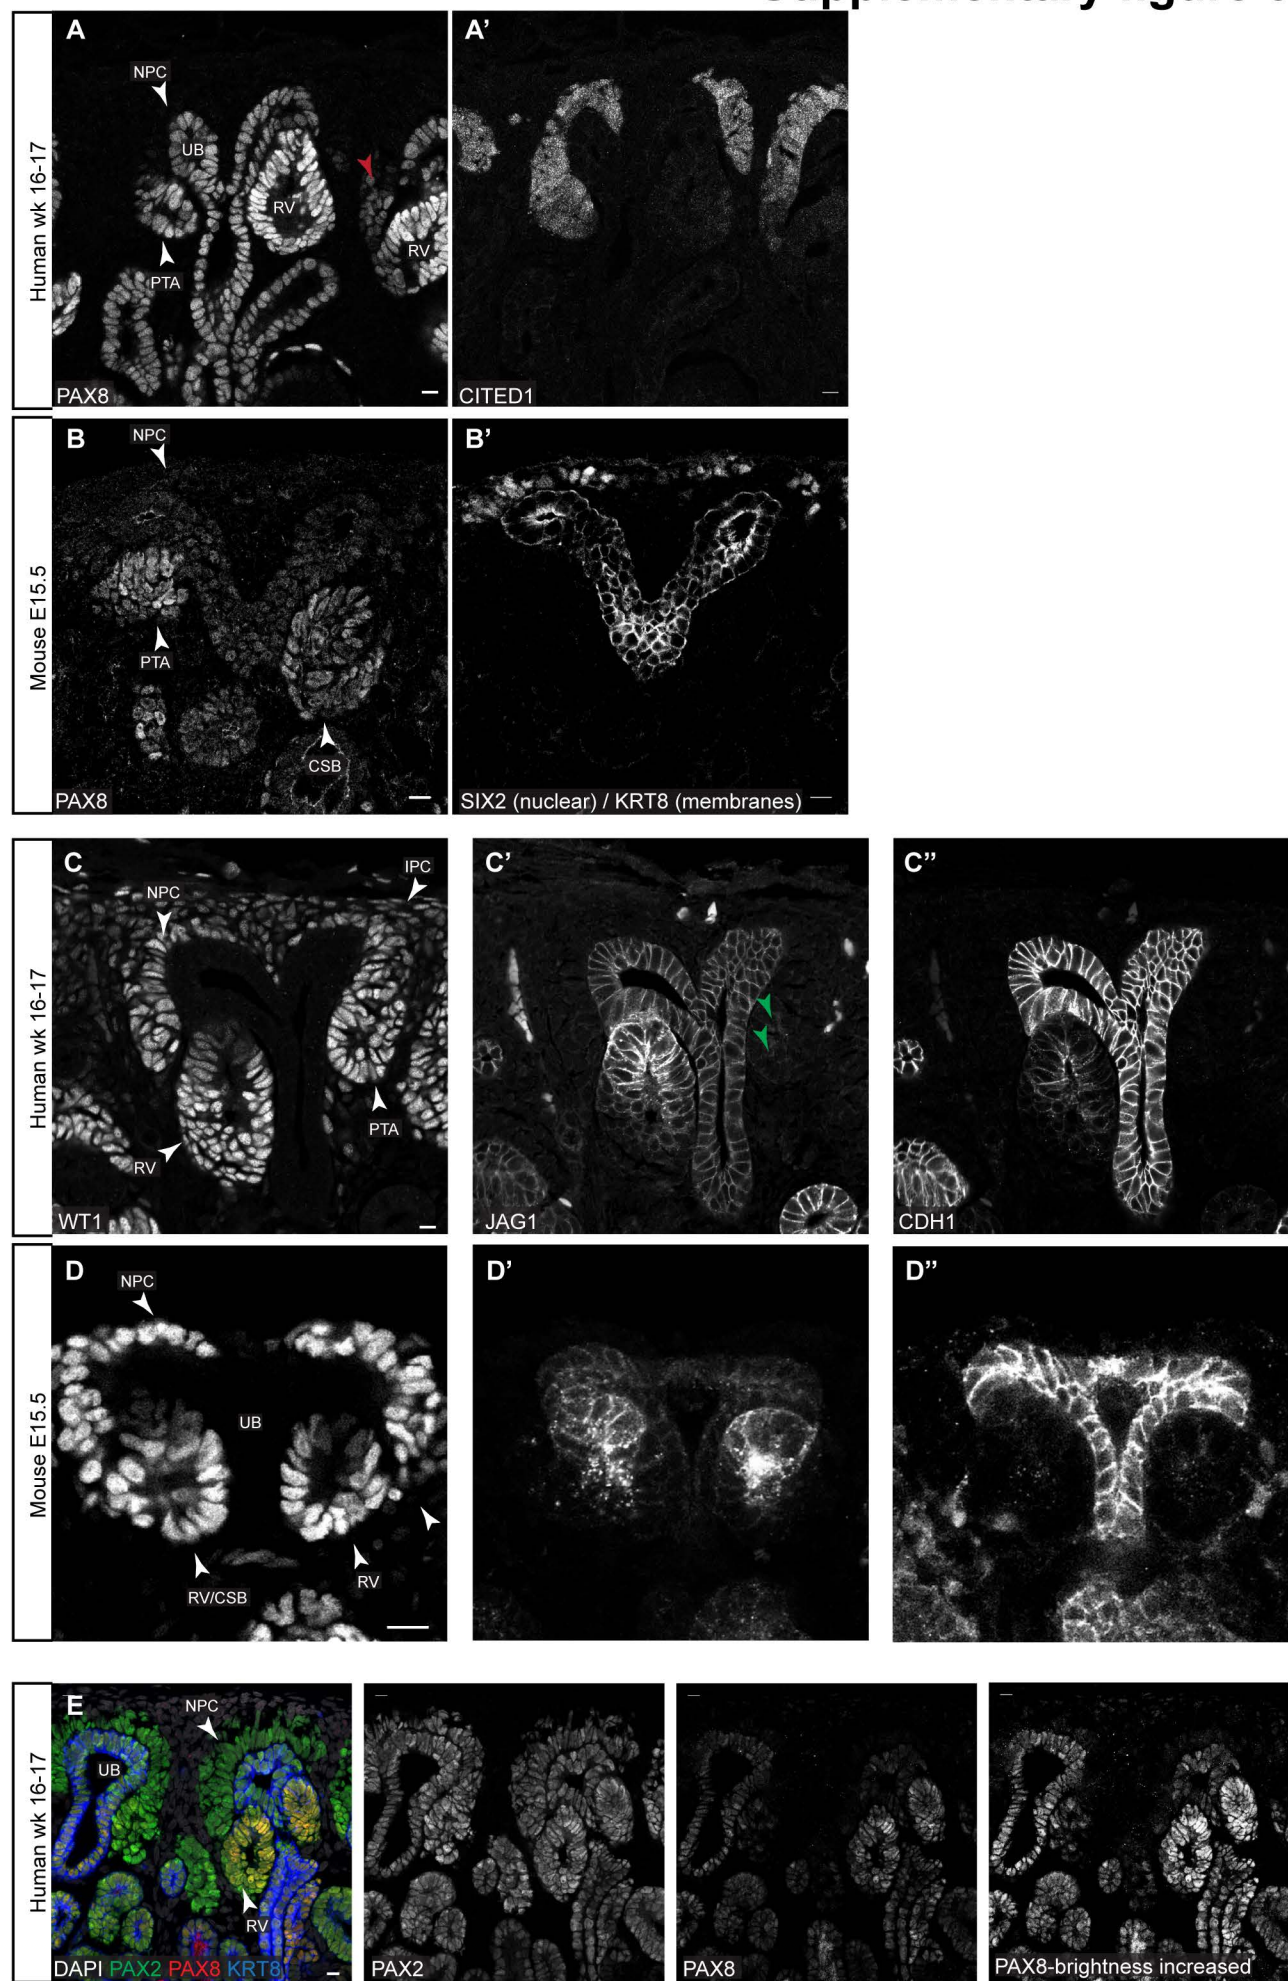

Expression and localization patterns for antibodies and *in situ* hybridization performed in study

| Gene symbol | Gene name                                                                      | Protein type          | Kidney phenotype/disease |       | Cap mesenchyme |       | Renal vesicle |       | S-shaped body nephron |       | Reference              |
|-------------|--------------------------------------------------------------------------------|-----------------------|--------------------------|-------|----------------|-------|---------------|-------|-----------------------|-------|------------------------|
|             |                                                                                |                       | Mouse                    | Human | Mouse          | Human | Mouse         | Human | Mouse                 | Human |                        |
| CDH1        | Cadherin 1                                                                     | Cell-adhesion protein | -                        | -     | -              | -     | +             | +     | +                     | +     | Vestweber et al., 1985 |
| CITED1      | Cbp/p300 interacting transactivator with Glu/Asp-rich carboxyterminal domain 1 | Transcription factor  | -                        | -     | +              | +     | -             | -     | -                     | -     | Boyle et al., 2007     |
| FOXC2       | Forkhead box C2                                                                | Transcription factor  | +                        | +     | +              | +     | +             | +     | +                     | +     | Takemoto et al., 2006  |
| GATA3       | Gata binding protein 3                                                         | Transcription factor  | +                        | +     | -              | -     | -             | -     | -                     | +     | Grote et al., 2008     |
| HES1        | Hairy/enhancer of split homolog 1                                              | Transcription factor  | -                        | -     | +              | +     | +             | +     | +                     | +     | Chen et al., 2005      |
| HNF1B       | Hnf1 homeobox B                                                                | Transcription factor  | +                        | +     | -              | -     | +             | +     | +                     | +     | Heliot et al., 2013    |
| HOXD11      | Homeobox d11                                                                   | Transcription factor  | +                        | -     | +              | +     | ?             | +     | ?                     | +     | Wellik et al., 2002    |
| JAG1        | Jagged 1                                                                       | Notch ligand          | +                        | +     | -              | -     | +             | +     | +                     | +     | Liu et al., 2013       |
| KRT8        | Keratin 8                                                                      | Cell-adhesion protein | -                        | -     | -              | -     | -             | +     | -                     | +     | Chen et al., 2005      |
| LEF1        | Lymphoidenhancer binding factor 1                                              | Transcription factor  | -                        | -     | -              | +     | +             | +     | +                     | +     | Mugford et al., 2009   |
| LHX1        | Lim homeobox gene 1                                                            | Transcription factor  | +                        | -     | -              | -     | +             | +     | +                     | +     | Kobayashi et al., 2005 |
| MAFB        | v-maf musculoaponeurotic fibrosarcoma oncogene family, protein B               | Transcription factor  | +                        | -     | -              | -     | +             | +     | +                     | +     | Moriguchi et al., 2006 |
| PAX2        | Paired box 2                                                                   | Transcription factor  | +                        | +     | +              | +     | +             | +     | +                     | +     | Bouchard et al., 2002  |
| PAX8        | Paired box 8                                                                   | Transcription factor  | +                        | +     | -              | -     | +             | +     | +                     | +     | Bouchard et al., 2002  |
| POU3F3      | POU domain, class 3, transcription factor 3                                    | Transcription factor  | +                        | -     | -              | -     | +             | +     | +                     | +     | Nakai et al., 2003     |
| SIX1        | Sine oculisrelated homeobox 1                                                  | Transcription factor  | +                        | +     | -              | +     | -             | +     | -                     | +     | Xu et al., 2003        |
| SIX2        | Sine oculisrelated homeobox 2                                                  | Transcription factor  | +                        | +     | +              | +     | +             | +     | -                     | +     | Self et al., 2006      |
| SOX9        | SRY-box 9                                                                      | Transcription factor  | +                        | +     | -              | -     | +             | +     | +                     | +     | Reginensi et al., 2011 |
| WNT4        | Wingless-type MMTV integration site family, member 4                           | Wnt ligand            | +                        | +     | -              | -     | +             | +     | +                     | +     | Stark et al., 1994     |
| WT1         | Wilms' Tumour Protein 1                                                        | Transcription factor  | +                        | +     | +              | +     | +             | +     | +                     | +     | Armstrong et al., 1994 |

## First point of detection for commonly used protein markers of mature tubule segments in the human kidney

| Gene symbol | Gene name                         | Stage first observed                                                                            | Gudmap ontology number |
|-------------|-----------------------------------|-------------------------------------------------------------------------------------------------|------------------------|
| LRP2        | LDL Receptor Related Protein 2    | Proximal segment of s-shaped body                                                               | 27764                  |
| SLC3A1      | Solute Carrier Family 3 Member 1  | Proximal segment of s-shaped body; early proximal tubule                                        | 27764 ; 27784          |
| SLC12A1     | Solute Carrier Family 12 Member 1 | Immature loop of Henle ascending limb                                                           | 35426                  |
| SLC12A3     | Solute Carrier Family 12 Member 3 | Early distal tubule (after Capillary Loop Stage)                                                | 28390                  |
| CUBN        | Cubilin                           | Early proximal tubule                                                                           | 27784                  |
| PODXL       | Podocalyxin Like                  | Proximal renal vesicle; visceral epithelium of s-shaped body                                    | 31549; 27766           |
| WT1         |                                   | Proximal renal vesicle; visceral epithelium of s-shaped body; proximal segment of s-shaped body | 31549; 27766 ; 27764   |
| NPHS2       | Podocin                           | Visceral epithelium of s-shaped body                                                            | 27766                  |
| MAFB        |                                   | Proximal renal vesicle; visceral epithelium of s-shaped body                                    | 31549; 27766           |
| UMOD        | Uromodulin                        | Early distal tubule (after Capillary Loop Stage)                                                | 28390                  |
| AQP1        | Aquaporin 1                       | Early proximal tubule (after Capillary Loop Stage)                                              | 27784                  |
